# Supplementary material for: A proposed model of Mycobacterium avium complex dihydrofolate reductase and its utility for drug designElectronic supplementary information (ESI) available: details of the calculations. See http://www.rsc.org/suppdata/ob/b2/b212211a/
Source: Royal Society of Chemistry journal article supplement (doi:10.1039/b212211a), 2003-03-13
Supplement: b212211a.doc [file b212211a.doc]

Supplementary Material for Organic & Biomolecular Chemistry

This journal is © The Royal Society of Chemistry 2003

Supplementary data

1. Percent identity is calculated as

n

Score =

Pmax – Pmin­ + 1

where n is the number of positions in the alignment where the residue identity is the same in both the query and a given sequence from the candidate family, Pmax is the alignment position of the last residue in the query sequence and Pmin is the alignment position of the first residue.

**2. Z-score** is calculated by generating a distribution of scores by repeated alignments of random permutations of the query sequence and the candidate sequence. The alignment score is then converted to a Z-score by subtracting the mean of this distribution and dividing by its standard deviation.

**3. Hydrophobic fitness score (Hfc)** is a sequence-to-fold compatibility function that measures the degree to which a particular sequence, when assigned a particular conformation, forms a compact hydrophobic core. A value less than – 7 should be seen as quite significant.

4. The four stages involved in the multiple sequence alignment include

1. Initial pair wise build-up – The initial estimate of the alignment can be calculated in one of two ways i) progressive, in which chains 1 and 2 are aligned first and chain 3 is then aligned to the resulting alignment and ii) tree-based, which precalculates all the alignment scores between each pair of chains. The alignment is built by aligning the chain or chains with the highest pair wise score. The pair wise score between two groups is defined as the maximum of all scores between their respective chains.
2. Round-robin realignment – The initial estimate of the alignment (or current alignment if stage (a) is skipped) is refined by a single round-robin series of realignments, wherein each chain in succession is extracted from the global alignment and re-aligned against the remaining chains.
3. Randomized iterative refinement – The results of stages (a) and (b) can be sensitive to the order in which the chains are processed. To reduce their sensitivity, a series of realignments can be performed in which the group of aligned chains is randomly partitioned into two groups, and a two-way alignment of the subsets is performed. If the new alignment improves the alignment score, it is accepted; otherwise it is rejected.

d) **Structure-based realignment** – Chains that possess coordinates for their alpha carbons can be realigned taking into account their structure. From the current initial estimate of the correct alignment, a new similarity matrix is generated using the relative C coordinates that result from a multi-body superposition. This matrix is used to realign just these C populated chains. This procedure is then repeated until the RMSD of the superposition fails to improve. At this point the structured chains are re-introduced as an indivisible unit among the unstructured chains and steps (a) through (c) are repeated.

5. The heart of the model building process is the step 2 (see 3D Model Building subsection under Experimental Section), in which multiple independent models are built. This step can be broken down into two stages. A) data collection and B) model building. In the data collection stage, lists of molecular data are collected for purposes of modeling missing atoms. The following lists are collected –

Indel lists – lists of backbone fragments that can span insertions in the target sequence.

Side chain lists – lists of alternative side chain conformations for residues with unmodeled side chain atoms.

Outgap lists – lists of backbone fragments for the modeling of residues in the model sequences that extend beyond the N-terminus or C-terminus of the template chain.

The indel data is collected by searching for backbone segments amongst high-resolution chains from the PDB,1 which superpose well onto anchor residues on either side of the insertion area. The segment search is permitted to back off from indel regions if no segment, which meets a specified RMSD criterion, is found. Side chain data is assembled from an extensive rotamer library, which has been generated by systematic clustering of high-resolution PDB data.

Once the molecular lists are collected, the model building stage begins, during which a number of independent models are created. Loops are modeled first, in random order. For each loop, the list of candidates collected in the segment searching stage is sorted using a contact energy function which takes into account all atoms already modeled, as well as any atoms specified by the user as belonging to the model environment, i.e., a ligand bound to the primary template. These energies are then used to make a Boltzmann-weighted choice amongst the candidates, and the coordinates of the chosen candidate are then copied to the model.

Using the same procedure above, any missing side chain atoms are modeled. Side chains belonging to residues whose backbone coordinates were copied from a template are modeled first, followed by side chains of modeled loops. Outgaps and their side chains are modeled last.

## 6. The search protocol (simulated annealing in the present study) explores the ligand configuration space by generating random changes to the ligand's coordinates. Each such change to the ligand's conformation is called a *move*. The method has an acceptance (rejection) test which is applied to each move and which drives the search along a trajectory towards an optimal solution. Simulated annealing is a global optimization technique based on the Monte Carlo method. It explores various states of a configuration space by generating small random changes in the current state and then accepting or rejecting each new state according to the Metropolis criterion.2 According to this criterion, moves that decrease the energy of the system are always accepted, while moves that increase the energy of the system are accepted according to probability *p*:


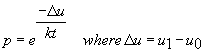


where *u0* is the energy of the current state, *u1* is the energy of the new state, *t* is the "temperature" of the simulation, and *k* is Boltzmann's constant.

**7.** In **MOE-Dock**, the configuration space includes all orientations and conformations of the ligand such that all of its atoms are inside the docking box. Each docking run begins with the ligand in either a random conformation or a user-determined, hand-docked conformation. When a random starting conformation is desired, the starting conformation is calculated using an abbreviated tabu search.3 A move from one configuration to another -- from one state to another -- consists of random perturbations of some or all of the rotatable bonds of the ligand, combined with an affined transformation of the resulting coordinates. Bond lengths are held fixed.

**8.** In the **grid-based method**, the interaction energy is calculated using electrostatic and van der Waals potential fields that have been sampled on a grid overlaying the docking box. The fields are interpolated at the atom positions by tri-linear interpolation. The van der Waals parameters are taken from the currently active forcefield, and the electrostatic field is calculated in a Coulombic manner using the current dielectric. The grid-based method calculates the potential energy grids only once, at the beginning of the docking procedure. Thus, subsequent energy calculations are considerably faster than if the built-in potential energy function were being used. However, when using grids, the solvation energy correction is not calculated.

**References**:

1. H. M. Berman, J. Westbrook, Z. Feng, G. Gilliland, T. N. Bhat, H. Weissig, I. N. Shindyalov and P. E. Bourne, *Nucleic Acids Res.*, 2000*,* **28**, 235 – 242.
2. N. Metropolis, A. W. Rosenbluth, M. N. Rosenbluth and A. H. Teller, *J. Chem. Phys.*,1953, **21**, 1087 – 1092.
3. C. A. Baxter, C. W. Murray, D. E. Clark, D. R. Westhead, and M. D. Eldridge, *Proteins: Structure, Function and Genetics*, 1998, **33**, 367 – 382.
